# Supplementary material
Source: PubMed Central journal article supplement (PMC3942663)

## Supplemental Figure Legends

### **Figure 1. Similar levels of NF $\kappa$ B signaling pathway components in *Smad3*<sup>+/+</sup> and <sup>-/-</sup> keratinocytes**

Immunoblot of indicated NF $\kappa$ B signaling molecules in total lysates isolated from primary *Smad3*<sup>+/+</sup> and <sup>-/-</sup> keratinocytes treated with TGF $\beta$ 1 (1ng/ml) for the indicated times. GAPDH levels were used as a loading control.

### **Figure 2. Lack of NF $\kappa$ B nuclear translocation but increased NF $\kappa$ B-luciferase activity in TGF $\beta$ 1 treated SP1 papilloma cells**

A) Immunoblot of NF $\kappa$ B p65 and p50 in nuclear extracts isolated from SP1 papilloma cells treated with 1 ng/ml TGF $\beta$ 1 for the indicated times. (B) pNF $\kappa$ B-luc reporter activity in SP1 papilloma cells treated with TGF $\beta$ 1 (1 ng/mL) for 24 hours. N=3. \* indicates significantly different from untreated, p<.05.

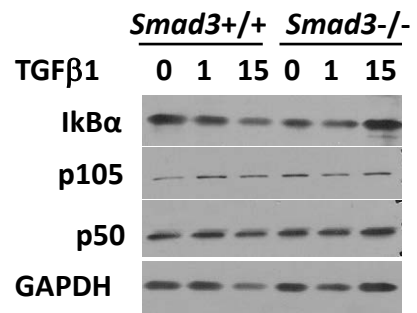

Supplementary Figure 1

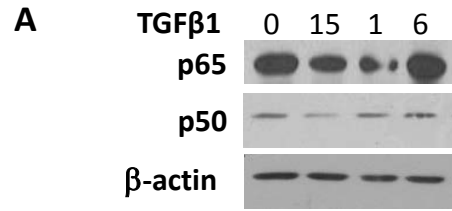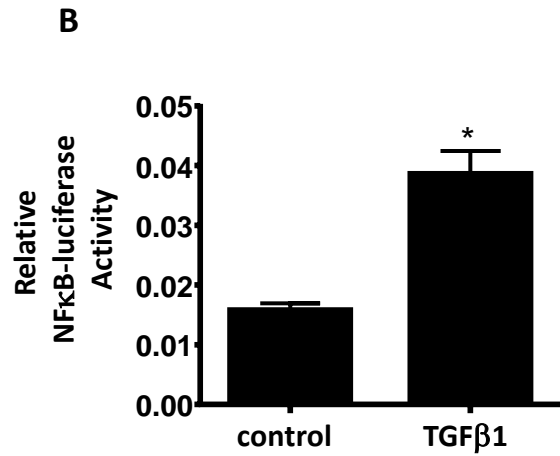

Supplement: NIHMS527861-supplement-01.pdf [file NIHMS527861-supplement-01.pdf]
